# Supplementary material
Source: PubMed Central journal article supplement (PMC3257908)
Supplement: supp_79.11.4342_IAI5592-11_SF1.pdf [file supp_79.11.4342_IAI5592-11_SF1.pdf]

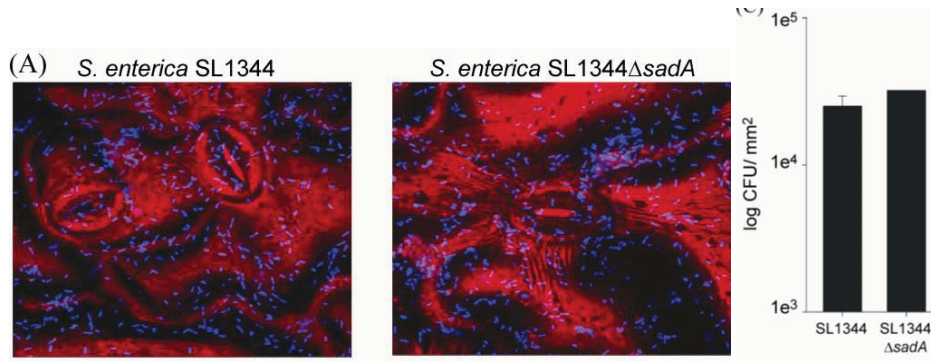

**Figure S1:** SadA does not mediate adhesion to salad leaves. (A) Image of strains adhering to leaves. No difference in adhesion was detected between *S. enterica* SL1344 and the SL1344Δ*sadA* mutant. (B) The number of bound CFU/ mm<sup>2</sup> of leaf for *S. enterica* SL1344, 5 SL1344Δ*sadA*, *E. coli* HB101 pQE60 and HB101 pDR03 (SadA+) strains. No difference was detected between the *S. enterica* strains. Expression of SadA in HB101 did not increase the binding of the bacterium to the leaf.
