# Supplementary material
Source: PubMed Central journal article supplement (PMC3257908)
Supplement: supp_79.11.4342_IAI5592-11_SF2.pdf [file supp_79.11.4342_IAI5592-11_SF2.pdf]

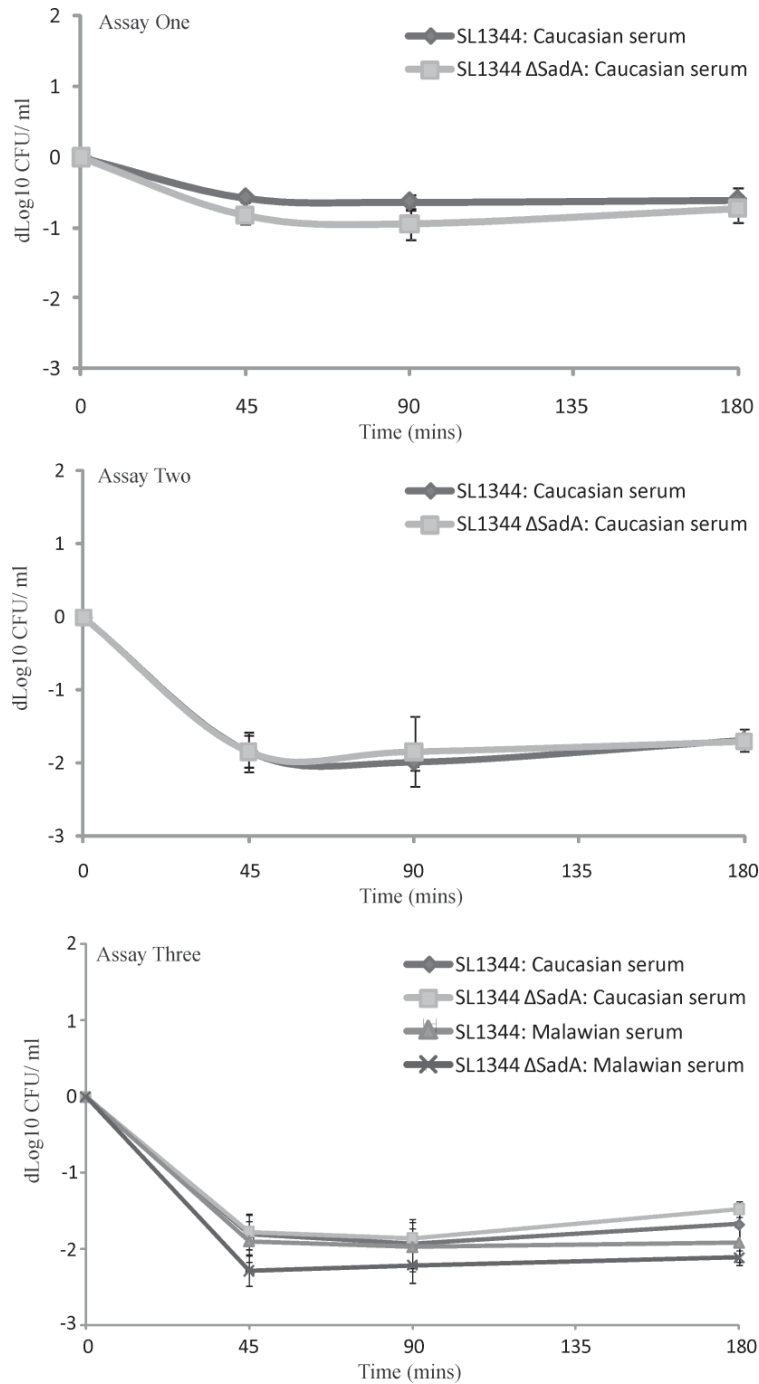

**Figure S2:** Deletion of *sadA* does not affect resistance to complement-mediated killing in control serum. The *S. enterica* SL1344 wild-type and *sadA* mutant strains were both tested for survival in human serum. Negative values correspond to bacterial killing in relation to initial *Salmonella* concentration of  $1 \times 10^6$  cfu/ml Three assays were performed on three

separate days, with serum taken from healthy individuals, either Caucasian or Malawian background. No difference in serum resistance was detected (Student's t test,  $P > 0.05$  for all comparisons at all time points). Data points are mean of three repeats  $\pm$  sd.
