# Supplementary material
Source: PubMed Central journal article supplement (PMC3257908)
Supplement: supp_79.11.4342_IAI5592-11_SF3.pdf [file supp_79.11.4342_IAI5592-11_SF3.pdf]

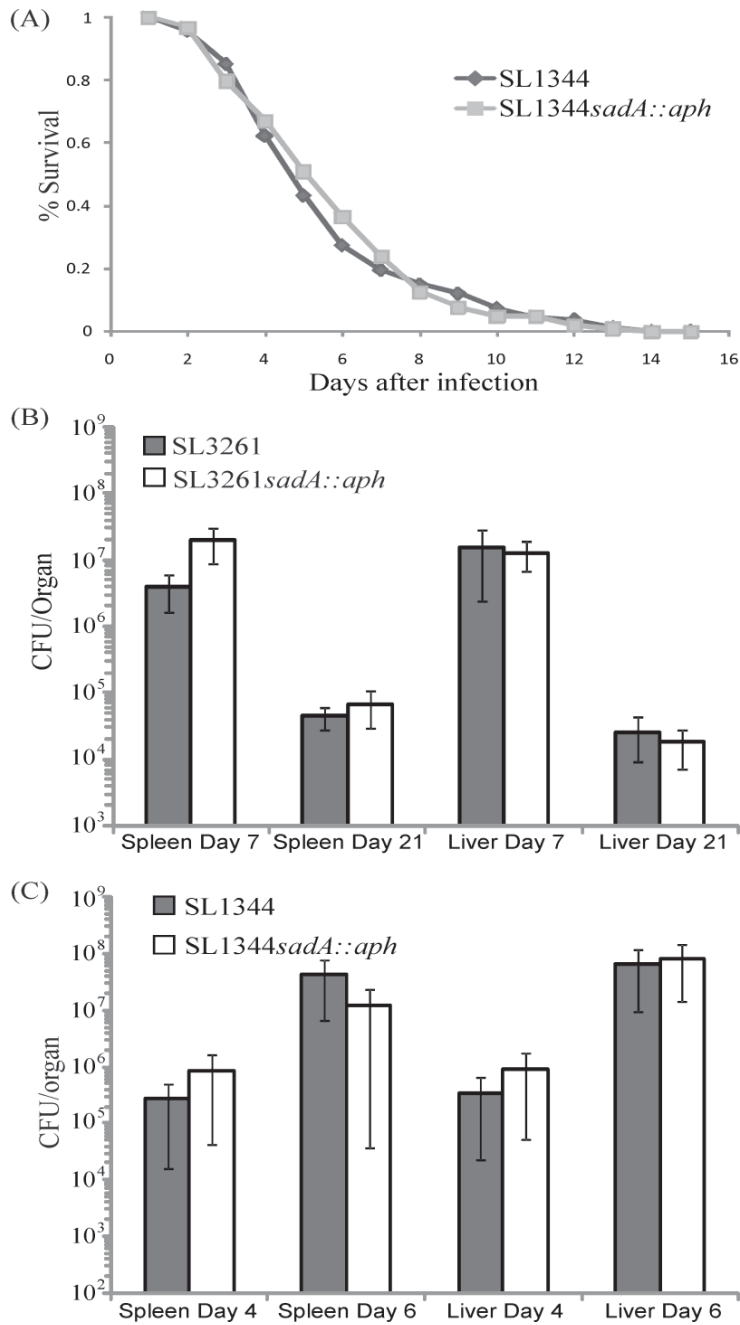

**Figure S3.** Virulence of wild-type and *sadA* mutant strains in the (A) *C. elegans* assay, (B) mouse IP challenge assay and (C) mouse oral challenge assay. No significant attenuation of virulence of the *S. enterica* mutant strain compared to the wild-type strain was detected in any of the assays.
