# Supplementary material
Source: PubMed Central journal article supplement (PMC3257908)
Supplement: supp_79.11.4342_IAI5592-11_ST1.pdf [file supp_79.11.4342_IAI5592-11_ST1.pdf]

Table S1 Primers used in this study

| Primers | Primer Description                                                | Sequence (5' →3')                                                 |
|---------|-------------------------------------------------------------------|-------------------------------------------------------------------|
| D1      | <i>sadA</i> forward primer used for gene disruption               | TCGGTCTTAGCAGCATTATGGTTTCTGCGGA<br>TGCACTGGCGTGTAGGCTGGAGCTGCTTC  |
| D2      | <i>sadA</i> reverse primer used for gene disruption               | GTCGTATTGGCGGCGATATCGGTTGTGTTCT<br>GGTTA ATGCGGGAATTAGCCATGGTCCAT |
| D3      | Upstream Check Primer                                             | AGTCCTCTGGAATGCCGCTA                                              |
| D4      | Downstream Check Primer                                           | TTGTGCTTAGCGCTGAATGC                                              |
| D5      | Forward primer used for cloning <i>sadA</i> into pET22b and pQE60 | GGAAATTACTACTCACATATGAATAGAATAT<br>TTAAAGTC                       |
| D6      | Reverse primer used for cloning <i>sadA</i> into pET22b           | AGAGTTAATTTAGAATTCTGTGAGTAGGCTG<br>TGG                            |
| D7      | Reverse primer used for cloning <i>sadA</i> into pQE60            | GCTACTAAGCTTTTACCACTGGAAGCCCGC                                    |
